# Supplementary material for: Untangling Brain-Wide Dynamics in Consciousness by Cross-Embedding
Source: PubMed Central journal article supplement (PMC4652869; doi:10.1371/journal.pcbi.1004537), 2015-11-19

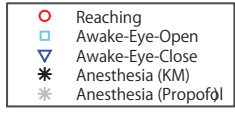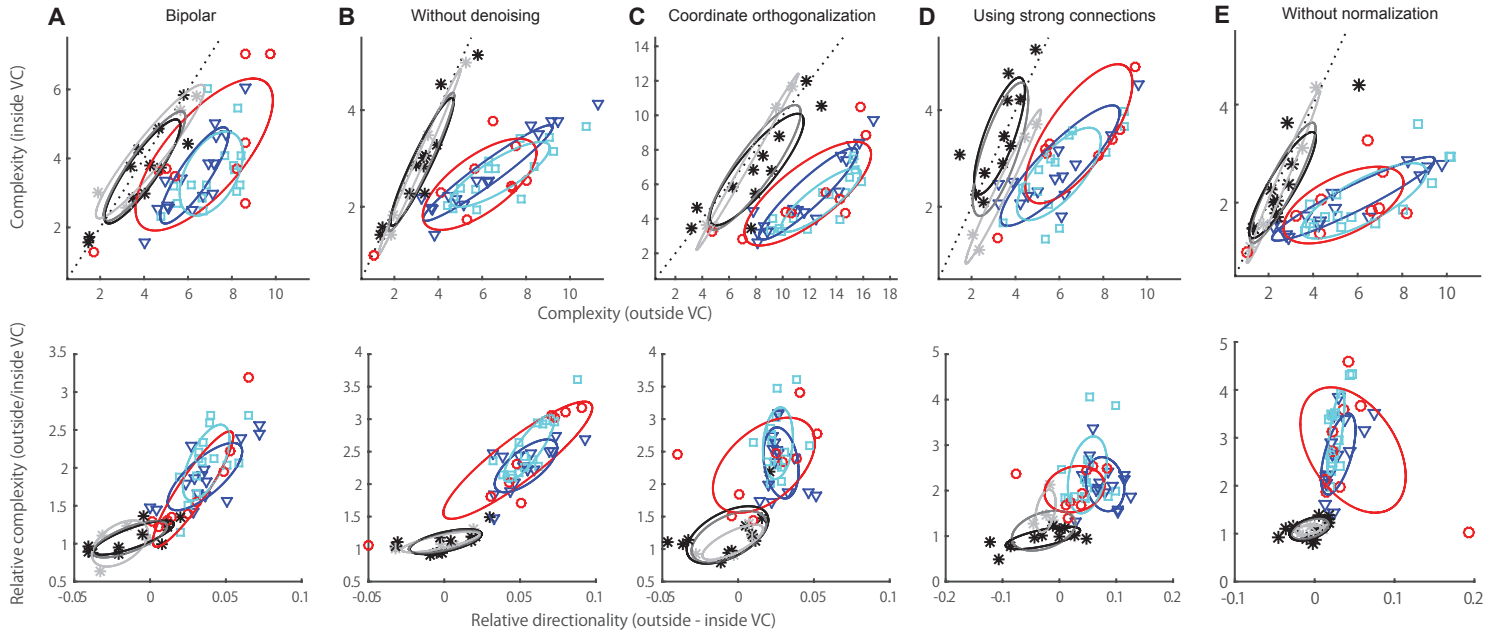

Supplement: pcbi.1004537.s001.pdf [file pcbi.1004537.s001.pdf]
